# Supplementary material for: Effectiveness of the nurse-led Activate intervention in patients at risk of cardiovascular disease in primary care: a cluster-randomised controlled trial
Source: PubMed Central journal article supplement — Eur J Cardiovasc Nurs. 2020 May 6;19(8):721–31. doi: 10.1177/1474515120919547 (PMC7817988; doi:10.1177/1474515120919547), 2020-05-06
Supplement: sj-pdf-1-cnu-10.1177_1474515120919547.pdf [file sj-pdf-1-cnu-10.1177_1474515120919547.pdf]

**Supplementary Material 1.** Selected behaviour change techniques (BCTs) for the Activate intervention and division of BCTs over the consultations

| Selected BCTs from BCTTv1                                                   | BCTs divided over components intervention |   |   |   |                       |          |
|-----------------------------------------------------------------------------|-------------------------------------------|---|---|---|-----------------------|----------|
|                                                                             | Consultations                             |   |   |   | Between consultations | Workbook |
|                                                                             | 1                                         | 2 | 3 | 4 |                       |          |
| 1. Goal setting (behaviour)                                                 | x                                         | x | x | x |                       |          |
| 2. Problem-solving (includes barrier identification and relapse prevention) | x                                         | x | x | x | x                     |          |
| 3. Goal setting (outcome)                                                   | x                                         |   |   |   | x                     |          |
| 4. Action planning                                                          | x                                         | x | x | x | x                     |          |
| 5. Review behavioural goals                                                 |                                           | x | x | x |                       |          |
| 6. Commitment                                                               |                                           | x | x | x |                       |          |
| 7. Feedback on behaviour                                                    | x                                         | x | x | x | x                     |          |
| 8. Self-monitoring of behaviour                                             | x                                         | x | x | x | x                     |          |
| 9. Social support (unspecified)                                             | x                                         | x | x | x |                       |          |
| 10. Social support (practical)                                              |                                           | x | x | x |                       |          |
| 11. Information about health consequences                                   | x                                         | x |   |   |                       | x        |
| 12. Prompt/cues                                                             |                                           | x | x | x |                       | x        |
| 13. Habit formation                                                         |                                           |   | x | x |                       |          |
| 14. Graded tasks                                                            | x                                         | x | x | x |                       |          |
| 15. Restructuring the physical environment                                  |                                           | x | x | x |                       |          |
| 16. Restructuring the social environment                                    |                                           | x | x | x |                       |          |
| 17. Focus on past success                                                   |                                           | x | x | x |                       |          |

*Abbreviations:* BCTs behaviour change techniques, BCTTv1 Behaviour Change Technique Taxonomy v1.
