# Supplementary material for: Effectiveness of the nurse-led Activate intervention in patients at risk of cardiovascular disease in primary care: a cluster-randomised controlled trial
Source: PubMed Central journal article supplement — Eur J Cardiovasc Nurs. 2020 May 6;19(8):721–31. doi: 10.1177/1474515120919547 (PMC7817988; doi:10.1177/1474515120919547), 2020-05-06
Supplement: sj-pdf-2-cnu-10.1177_1474515120919547.pdf [file sj-pdf-2-cnu-10.1177_1474515120919547.pdf]

**Supplementary Material.** Division of selected BCTs over the different components of the training of primary care nurses

| Selected BCTs from BCTTv1                                      | <b>BCTs divided over components training</b> |          |                      |                        |
|----------------------------------------------------------------|----------------------------------------------|----------|----------------------|------------------------|
|                                                                | Preparatio<br>n                              | Training | Coaching<br>sessions | Available<br>resources |
| 1. Information about health consequences                       | x                                            | x        |                      | x                      |
| 2. Information about social and environmental consequences     | x                                            | x        |                      | x                      |
| 3. Prompts/cues                                                |                                              | x        |                      | x                      |
| 4. Feedback on the behaviour                                   |                                              | x        | x                    |                        |
| 5. Information about others approval                           |                                              | x        | x                    |                        |
| 6. Credible source                                             | x                                            | x        | x                    | x                      |
| 7. Focus on past success                                       |                                              | x        | x                    |                        |
| 8. Verbal persuasion about capability                          |                                              | x        | x                    |                        |
| 9. Reward                                                      |                                              | x        | x                    |                        |
| 10. Monitoring of behaviour by others without feedback         |                                              | x        | x                    |                        |
| 11. Monitoring outcome of behaviour by others without feedback |                                              | x        |                      |                        |
| 12. Instruction on how to perform the behaviour                | x                                            | x        | x                    | x                      |
| 13. Demonstration of the behaviour                             |                                              | x        | x                    | x                      |
| 14. Behavioural practice/rehearsal                             |                                              | x        | x                    | x                      |
| 15. Habit formation                                            |                                              | x        | x                    | x                      |
| 16. Adding objects to the environment                          |                                              | x        | x                    | x                      |
| 17. Restructuring the physical environment                     |                                              | x        | x                    | x                      |
| 18. Social support (unspecified)                               |                                              | x        | x                    |                        |
| 19. Social support (practical)                                 |                                              | x        | x                    |                        |
| 20. Problem solving                                            |                                              | x        | x                    | x                      |
| 21. Self-monitoring of behaviour                               |                                              | x        | x                    |                        |

*Abbreviations:* BCTs behaviour change techniques; BCTTv1 Behaviour Change Technique Taxonomy v1
