# Supplementary material for: Effectiveness of the nurse-led Activate intervention in patients at risk of cardiovascular disease in primary care: a cluster-randomised controlled trial
Source: PubMed Central journal article supplement — Eur J Cardiovasc Nurs. 2020 May 6;19(8):721–31. doi: 10.1177/1474515120919547 (PMC7817988; doi:10.1177/1474515120919547), 2020-05-06
Supplement: sj-pdf-3-cnu-10.1177_1474515120919547.pdf [file sj-pdf-3-cnu-10.1177_1474515120919547.pdf]

**Supplementary Material 3a.** CONSORT 2010 checklist of information for the Activate cluster-randomised controlled trial

| <b>Section/Topic</b>             | <b>Item No</b> | <b>Standard Checklist item</b>                                                                                                                 | <b>Extension for cluster designs</b>                                                                                                                                                                                    |
|----------------------------------|----------------|------------------------------------------------------------------------------------------------------------------------------------------------|-------------------------------------------------------------------------------------------------------------------------------------------------------------------------------------------------------------------------|
| <b>Title and abstract</b>        |                |                                                                                                                                                |                                                                                                                                                                                                                         |
|                                  | 1a             | Identification as a randomised trial in the title: YES                                                                                         | Identification as a cluster randomised trial in the title: YES                                                                                                                                                          |
|                                  | 1b             | Structured summary of trial design, methods, results, and conclusions (for specific guidance see CONSORT for abstracts): <sup>1,2</sup> MOSTLY | See Appendix 3b below                                                                                                                                                                                                   |
| <b>Introduction</b>              |                |                                                                                                                                                |                                                                                                                                                                                                                         |
| <b>Background and objectives</b> | 2a             | Scientific background and explanation of rationale: YES                                                                                        | Rationale for using a cluster design: YES                                                                                                                                                                               |
|                                  | 2b             | Specific objectives or hypotheses: YES                                                                                                         | Whether objectives pertain to the cluster level, the individual participant level or both: YES                                                                                                                          |
| <b>Methods</b>                   |                |                                                                                                                                                |                                                                                                                                                                                                                         |
| <b>Trial design</b>              | 3a             | Description of trial design (such as parallel, factorial) including allocation ratio: YES                                                      | Definition of cluster and description of how the design features apply to the clusters: YES                                                                                                                             |
|                                  | 3b             | Important changes to methods after trial commencement (such as eligibility criteria), with reasons: Not applicable                             |                                                                                                                                                                                                                         |
| <b>Participants</b>              | 4a             | Eligibility criteria for participants: YES                                                                                                     | Eligibility criteria for clusters: YES                                                                                                                                                                                  |
|                                  | 4b             | Settings and locations where the data were collected: YES                                                                                      |                                                                                                                                                                                                                         |
| <b>Interventions</b>             | 5              | The interventions for each group with sufficient details to allow replication, including how and when they were actually administered: YES     | Whether interventions pertain to the cluster level, the individual participant level or both: YES (also in published protocol)                                                                                          |
| <b>Outcomes</b>                  | 6a             | Completely defined pre-specified primary and secondary outcome measures, including how and when they were assessed: YES                        | Whether outcome measures pertain to the cluster level, the individual participant level or both: YES                                                                                                                    |
|                                  | 6b             | Any changes to trial outcomes after the trial commenced, with reasons: not applicable                                                          |                                                                                                                                                                                                                         |
| <b>Sample size</b>               | 7a             | How sample size was determined: YES                                                                                                            | Method of calculation, number of clusters(s) (and whether equal or unequal cluster sizes are assumed), cluster size, a coefficient of intracluster correlation (ICC or $k$ ), and an indication of its uncertainty: YES |
|                                  | 7b             | When applicable, explanation of any interim analyses and stopping guidelines: not applicable                                                   |                                                                                                                                                                                                                         |
| <b>Randomisation:</b>            |                |                                                                                                                                                |                                                                                                                                                                                                                         |
| <b>Sequence generation</b>       | 8a             | Method used to generate the random allocation sequence: YES                                                                                    |                                                                                                                                                                                                                         |
|                                  | 8b             | Type of randomisation; details                                                                                                                 | Details of stratification or matching if                                                                                                                                                                                |

|                                                             |     |                                                                                                                                                                                                  |                                                                                                                                                                                                 |
|-------------------------------------------------------------|-----|--------------------------------------------------------------------------------------------------------------------------------------------------------------------------------------------------|-------------------------------------------------------------------------------------------------------------------------------------------------------------------------------------------------|
|                                                             |     | of any restriction (such as blocking and block size): YES                                                                                                                                        | used: YES                                                                                                                                                                                       |
| <b>Allocation concealment mechanism</b>                     | 9   | Mechanism used to implement the random allocation sequence (such as sequentially numbered containers), describing any steps taken to conceal the sequence until interventions were assigned: YES | Specification that allocation was based on clusters rather than individuals and whether allocation concealment (if any) was at the cluster level, the individual participant level or both: YES |
| <b>Implementation</b>                                       | 10  | Who generated the random allocation sequence, who enrolled participants, and who assigned participants to interventions                                                                          | Replace by 10a, 10b and 10c                                                                                                                                                                     |
|                                                             | 10a |                                                                                                                                                                                                  | Who generated the random allocation sequence, who enrolled clusters, and who assigned clusters to interventions: YES                                                                            |
|                                                             | 10b |                                                                                                                                                                                                  | Mechanism by which individual participants were included in clusters for the purposes of the trial (such as complete enumeration, random sampling): YES                                         |
|                                                             | 10c |                                                                                                                                                                                                  | From whom consent was sought (representatives of the cluster, or individual cluster members, or both), and whether consent was sought before or after randomisation: YES                        |
| <b>Blinding</b>                                             | 11a | If done, who was blinded after assignment to interventions (for example, participants, care providers, those assessing outcomes) and how: YES                                                    |                                                                                                                                                                                                 |
|                                                             | 11b | If relevant, description of the similarity of interventions: not applicable                                                                                                                      |                                                                                                                                                                                                 |
| <b>Statistical methods</b>                                  | 12a | Statistical methods used to compare groups for primary and secondary outcomes: YES                                                                                                               | How clustering was taken into account: YES                                                                                                                                                      |
|                                                             | 12b | Methods for additional analyses, such as subgroup analyses and adjusted analyses: YES                                                                                                            |                                                                                                                                                                                                 |
| <b>Results</b>                                              |     |                                                                                                                                                                                                  |                                                                                                                                                                                                 |
| <b>Participant flow (a diagram is strongly recommended)</b> | 13a | For each group, the numbers of participants who were randomly assigned, received intended treatment, and were analysed for the primary outcome: YES                                              | For each group, the numbers of clusters that were randomly assigned, received intended treatment, and were analysed for the primary outcome: YES (CONSORT diagram)                              |
|                                                             | 13b | For each group, losses and exclusions after randomisation, together with reasons: YES                                                                                                            | For each group, losses and exclusions for both clusters and individual cluster members: YES (CONSORT diagram)                                                                                   |
| <b>Recruitment</b>                                          | 14a | Dates defining the periods of recruitment and follow-up: YES                                                                                                                                     |                                                                                                                                                                                                 |
|                                                             | 14b | Why the trial ended or was stopped: not applicable                                                                                                                                               |                                                                                                                                                                                                 |
| <b>Baseline data</b>                                        | 15  | A table showing baseline                                                                                                                                                                         | Baseline characteristics for the                                                                                                                                                                |

|                                |     |                                                                                                                                                                |                                                                                                                                                                               |
|--------------------------------|-----|----------------------------------------------------------------------------------------------------------------------------------------------------------------|-------------------------------------------------------------------------------------------------------------------------------------------------------------------------------|
|                                |     | demographic and clinical characteristics for each group: YES                                                                                                   | individual and cluster levels as applicable for each group: YES (for individuals for each group)                                                                              |
| <b>Numbers analysed</b>        | 16  | For each group, number of participants (denominator) included in each analysis and whether the analysis was by original assigned groups: YES (CONSORT diagram) | For each group, number of clusters included in each analysis: NO (but not necessary, as individual analyses, taking account of clustering in analyses)                        |
| <b>Outcomes and estimation</b> | 17a | For each primary and secondary outcome, results for each group, and the estimated effect size and its precision (such as 95% confidence interval): YES         | Results at the individual or cluster level as applicable and a coefficient of intracluster correlation (ICC or k) for each primary outcome: YES (results at individual level) |
|                                | 17b | For binary outcomes, presentation of both absolute and relative effect sizes is recommended: not applicable                                                    |                                                                                                                                                                               |
| <b>Ancillary analyses</b>      | 18  | Results of any other analyses performed, including subgroup analyses and adjusted analyses, distinguishing pre-specified from exploratory: YES                 |                                                                                                                                                                               |
| <b>Harms</b>                   | 19  | All important harms or unintended effects in each group (for specific guidance see CONSORT for harms <sup>3</sup> ): Not applicable                            |                                                                                                                                                                               |
| <b>Discussion</b>              |     |                                                                                                                                                                |                                                                                                                                                                               |
| <b>Limitations</b>             | 20  | Trial limitations, addressing sources of potential bias, imprecision, and, if relevant, multiplicity of analyses: YES                                          |                                                                                                                                                                               |
| <b>Generalisability</b>        | 21  | Generalisability (external validity, applicability) of the trial findings: YES                                                                                 | Generalisability to clusters and/or individual participants (as relevant): YES (to individual participants)                                                                   |
| <b>Interpretation</b>          | 22  | Interpretation consistent with results, balancing benefits and harms, and considering other relevant evidence: YES                                             |                                                                                                                                                                               |
| <b>Other information</b>       |     |                                                                                                                                                                |                                                                                                                                                                               |
| <b>Registration</b>            | 23  | Registration number and name of trial registry: YES                                                                                                            |                                                                                                                                                                               |
| <b>Protocol</b>                | 24  | Where the full trial protocol can be accessed, if available: YES                                                                                               |                                                                                                                                                                               |
| <b>Funding</b>                 | 25  | Sources of funding and other support (such as supply of drugs), role of funders: YES                                                                           |                                                                                                                                                                               |

**Supplementary Material 3b.** Extension of CONSORT for abstracts<sup>1,2,3</sup> to reports of cluster-randomised trials

| Item                | Standard Checklist item    | Extension for cluster trials       |
|---------------------|----------------------------|------------------------------------|
| <b>Title</b>        |                            |                                    |
| <b>Trial design</b> | Identification of study as | Identification of study as cluster |

|                           |                                                                                                                 |                                                                                                                            |
|---------------------------|-----------------------------------------------------------------------------------------------------------------|----------------------------------------------------------------------------------------------------------------------------|
|                           | randomised: YES<br>Description of the trial design (e.g. parallel, cluster, non-inferiority): YES               | randomised: YES                                                                                                            |
| <b>Methods</b>            |                                                                                                                 |                                                                                                                            |
| <b>Participants</b>       | Eligibility criteria for participants and the settings where the data were collected: Partly                    | Eligibility criteria for clusters: NO                                                                                      |
| <b>Interventions</b>      | Interventions intended for each group: YES                                                                      |                                                                                                                            |
| <b>Objective</b>          | Specific objective or hypothesis: YES                                                                           | Whether objective or hypothesis pertains to the cluster level, the individual participant level or both: YES (individual)  |
| <b>Outcome</b>            | Clearly defined primary outcome for this report: YES                                                            | Whether the primary outcome pertains to the cluster level, the individual participant level or both: YES (individual)      |
| <b>Randomization</b>      | How participants were allocated to interventions: YES                                                           | How clusters were allocated to interventions: YES                                                                          |
| <b>Blinding (masking)</b> | Whether or not participants, care givers, and those assessing the outcomes were blinded to group assignment: NO |                                                                                                                            |
| <b>Results</b>            |                                                                                                                 |                                                                                                                            |
| <b>Numbers randomized</b> | Number of participants randomized to each group: YES                                                            | Number of clusters randomized to each group: YES                                                                           |
| <b>Recruitment</b>        | Trial status                                                                                                    | Not applicable                                                                                                             |
| <b>Numbers analysed</b>   | Number of participants analysed in each group: YES                                                              | Number of clusters analysed in each group: NO, not applicable, as analysis at individual level controlling for clustering. |
| <b>Outcome</b>            | For the primary outcome, a result for each group and the estimated effect size and its precision: Yes           | Results at the cluster or individual participant level as applicable for each primary outcome: At individual level         |
| <b>Harms</b>              | Important adverse events or side effects: Not applicable                                                        |                                                                                                                            |
| <b>Conclusions</b>        |                                                                                                                 |                                                                                                                            |
|                           | General interpretation of the results: YES                                                                      |                                                                                                                            |
| <b>Trial registration</b> | Registration number and name of trial register: YES                                                             |                                                                                                                            |
| <b>Funding</b>            | Source of funding: YES                                                                                          |                                                                                                                            |

## References

1. Hopewell S, Clarke M, Moher D, Wager E, Middleton P, Altman DG, et al. CONSORT for reporting randomised trials in journal and conference abstracts. *Lancet* 2008, 371:281-283
2. Hopewell S, Clarke M, Moher D, Wager E, Middleton P, Altman DG at al (2008) CONSORT for reporting randomized controlled trials in journal and conference abstracts: explanation and elaboration. *PLoS Med* 5(1): e20
3. Ioannidis JP, Evans SJ, Gotzsche PC, O'Neill RT, Altman DG, Schulz K, Moher D. Better reporting of harms in randomized trials: an extension of the CONSORT statement. *Ann Intern Med* 2004; 141(10):781-788.
