# Supplementary material for: Effectiveness of the nurse-led Activate intervention in patients at risk of cardiovascular disease in primary care: a cluster-randomised controlled trial
Source: PubMed Central journal article supplement — Eur J Cardiovasc Nurs. 2020 May 6;19(8):721–31. doi: 10.1177/1474515120919547 (PMC7817988; doi:10.1177/1474515120919547), 2020-05-06

**Supplementary Material 4.** Estimated means of age, body mass index, educational level, depression, and patient-provider relationship

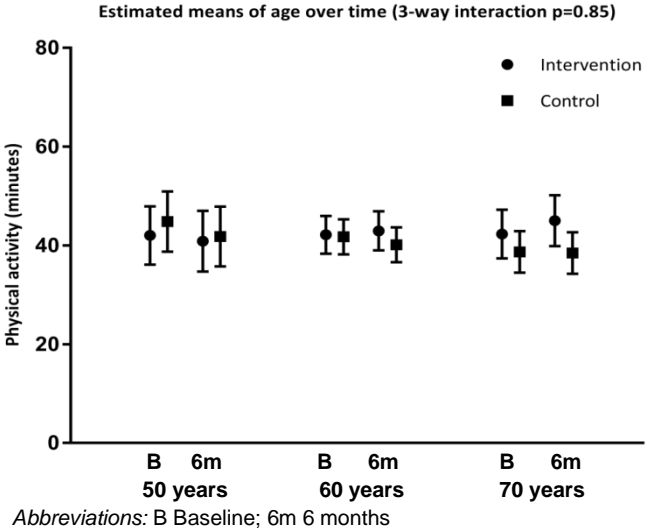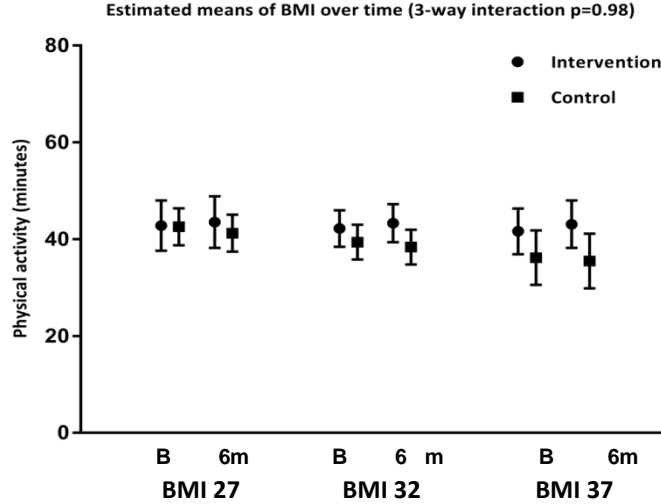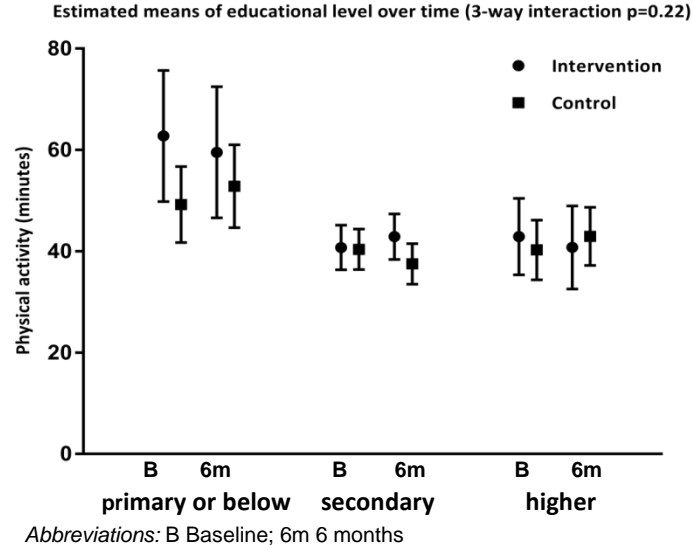

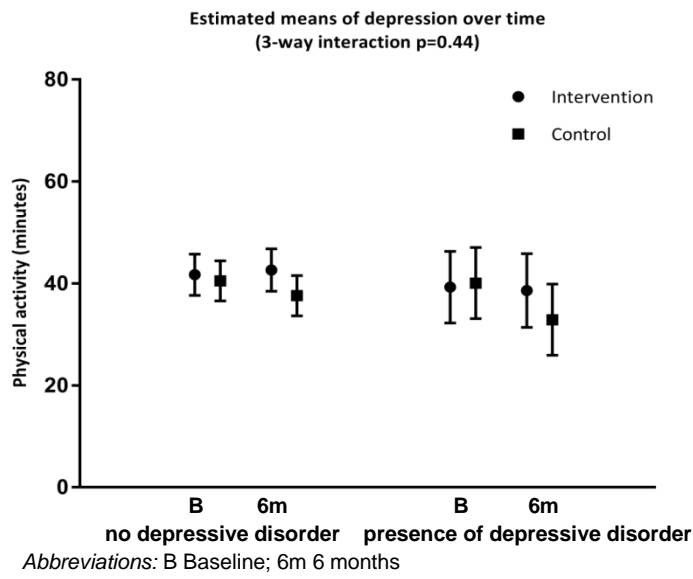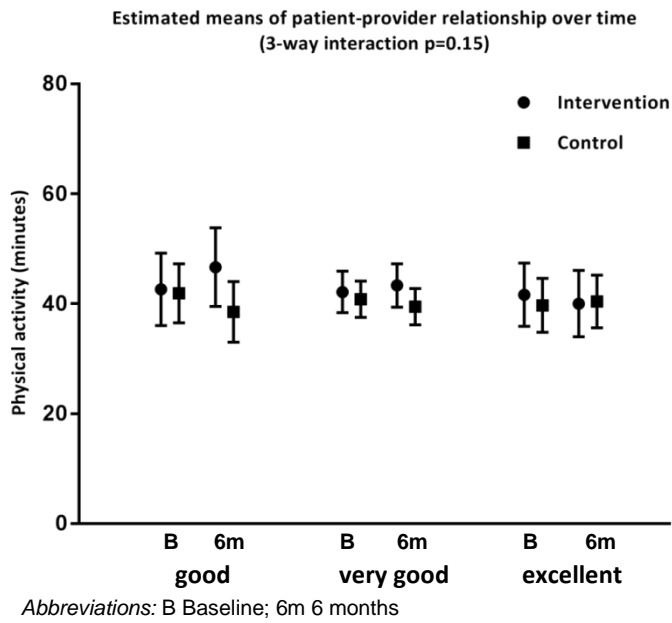

Supplement: sj-pdf-4-cnu-10.1177_1474515120919547.pdf [file sj-pdf-4-cnu-10.1177_1474515120919547.pdf]
